# Supplementary material for: Identification of a ferroptosis-related gene signature (FRGS) for predicting clinical outcome in lung adenocarcinoma
Source: PeerJ journal article supplement (doi:10.7717/peerj.11233), 2021-04-13

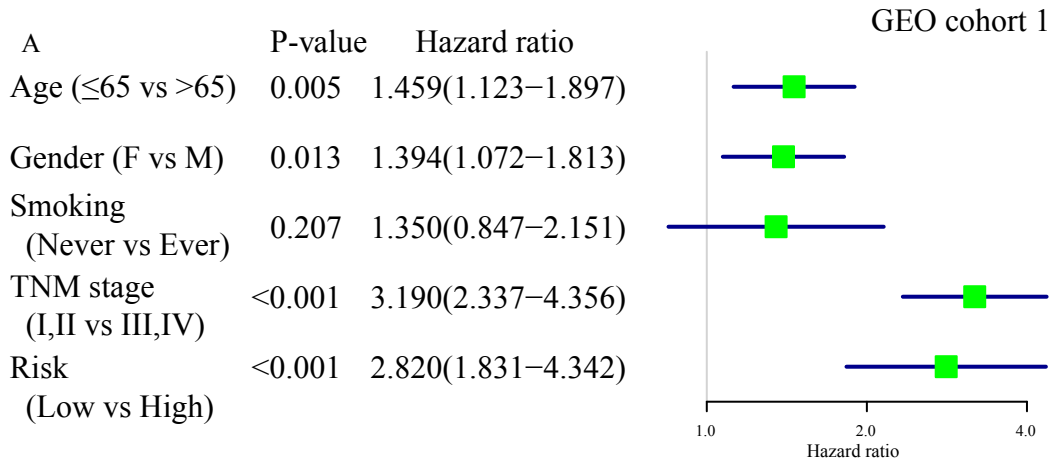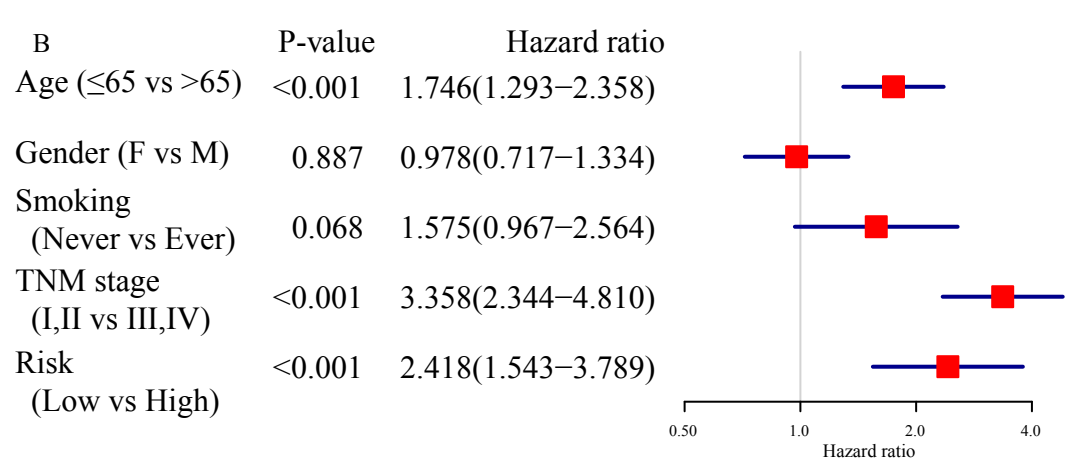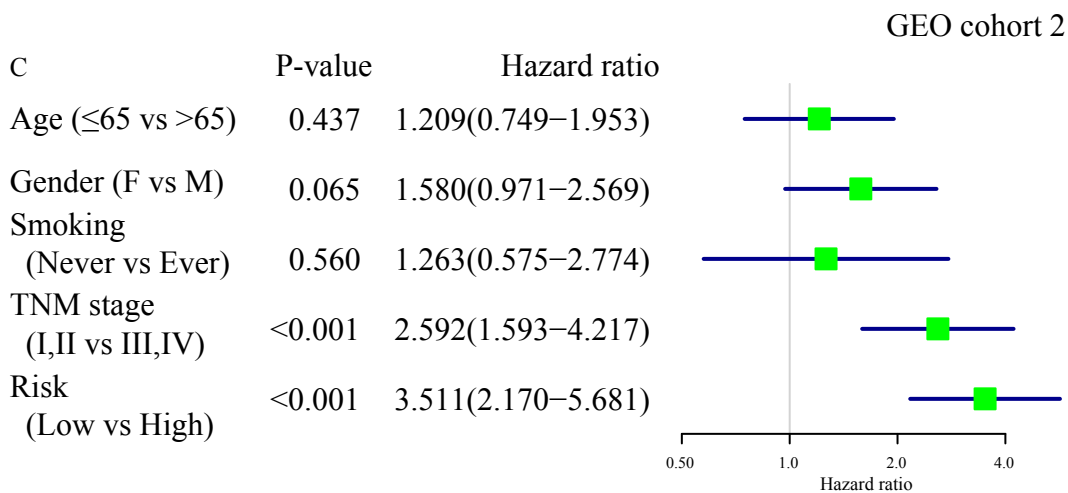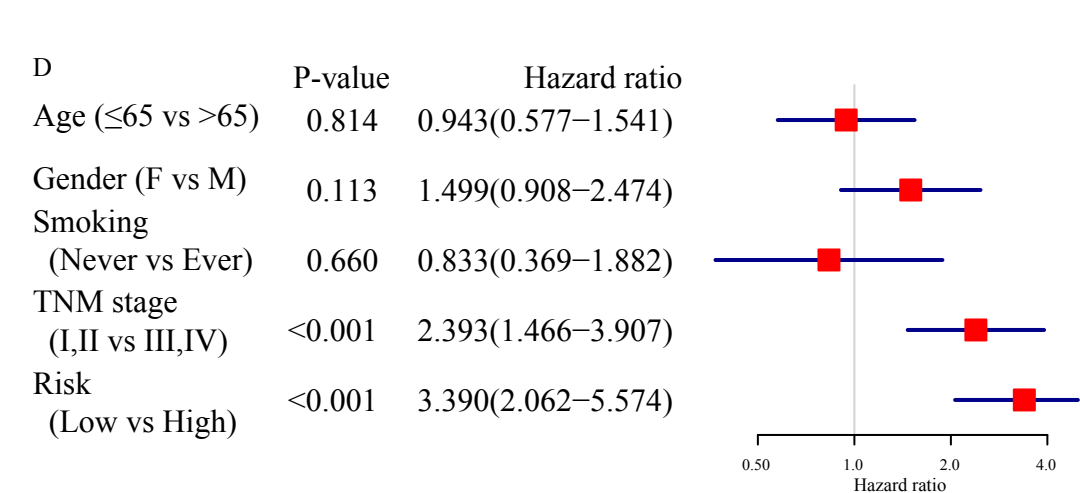

Supplement: Figure_S3.pdf [file Figure_S3.pdf]
