# Supplementary material for: Identification of a ferroptosis-related gene signature (FRGS) for predicting clinical outcome in lung adenocarcinoma
Source: PubMed Central journal article supplement (PMC8051350; doi:10.7717/peerj.11233), 2021-04-13

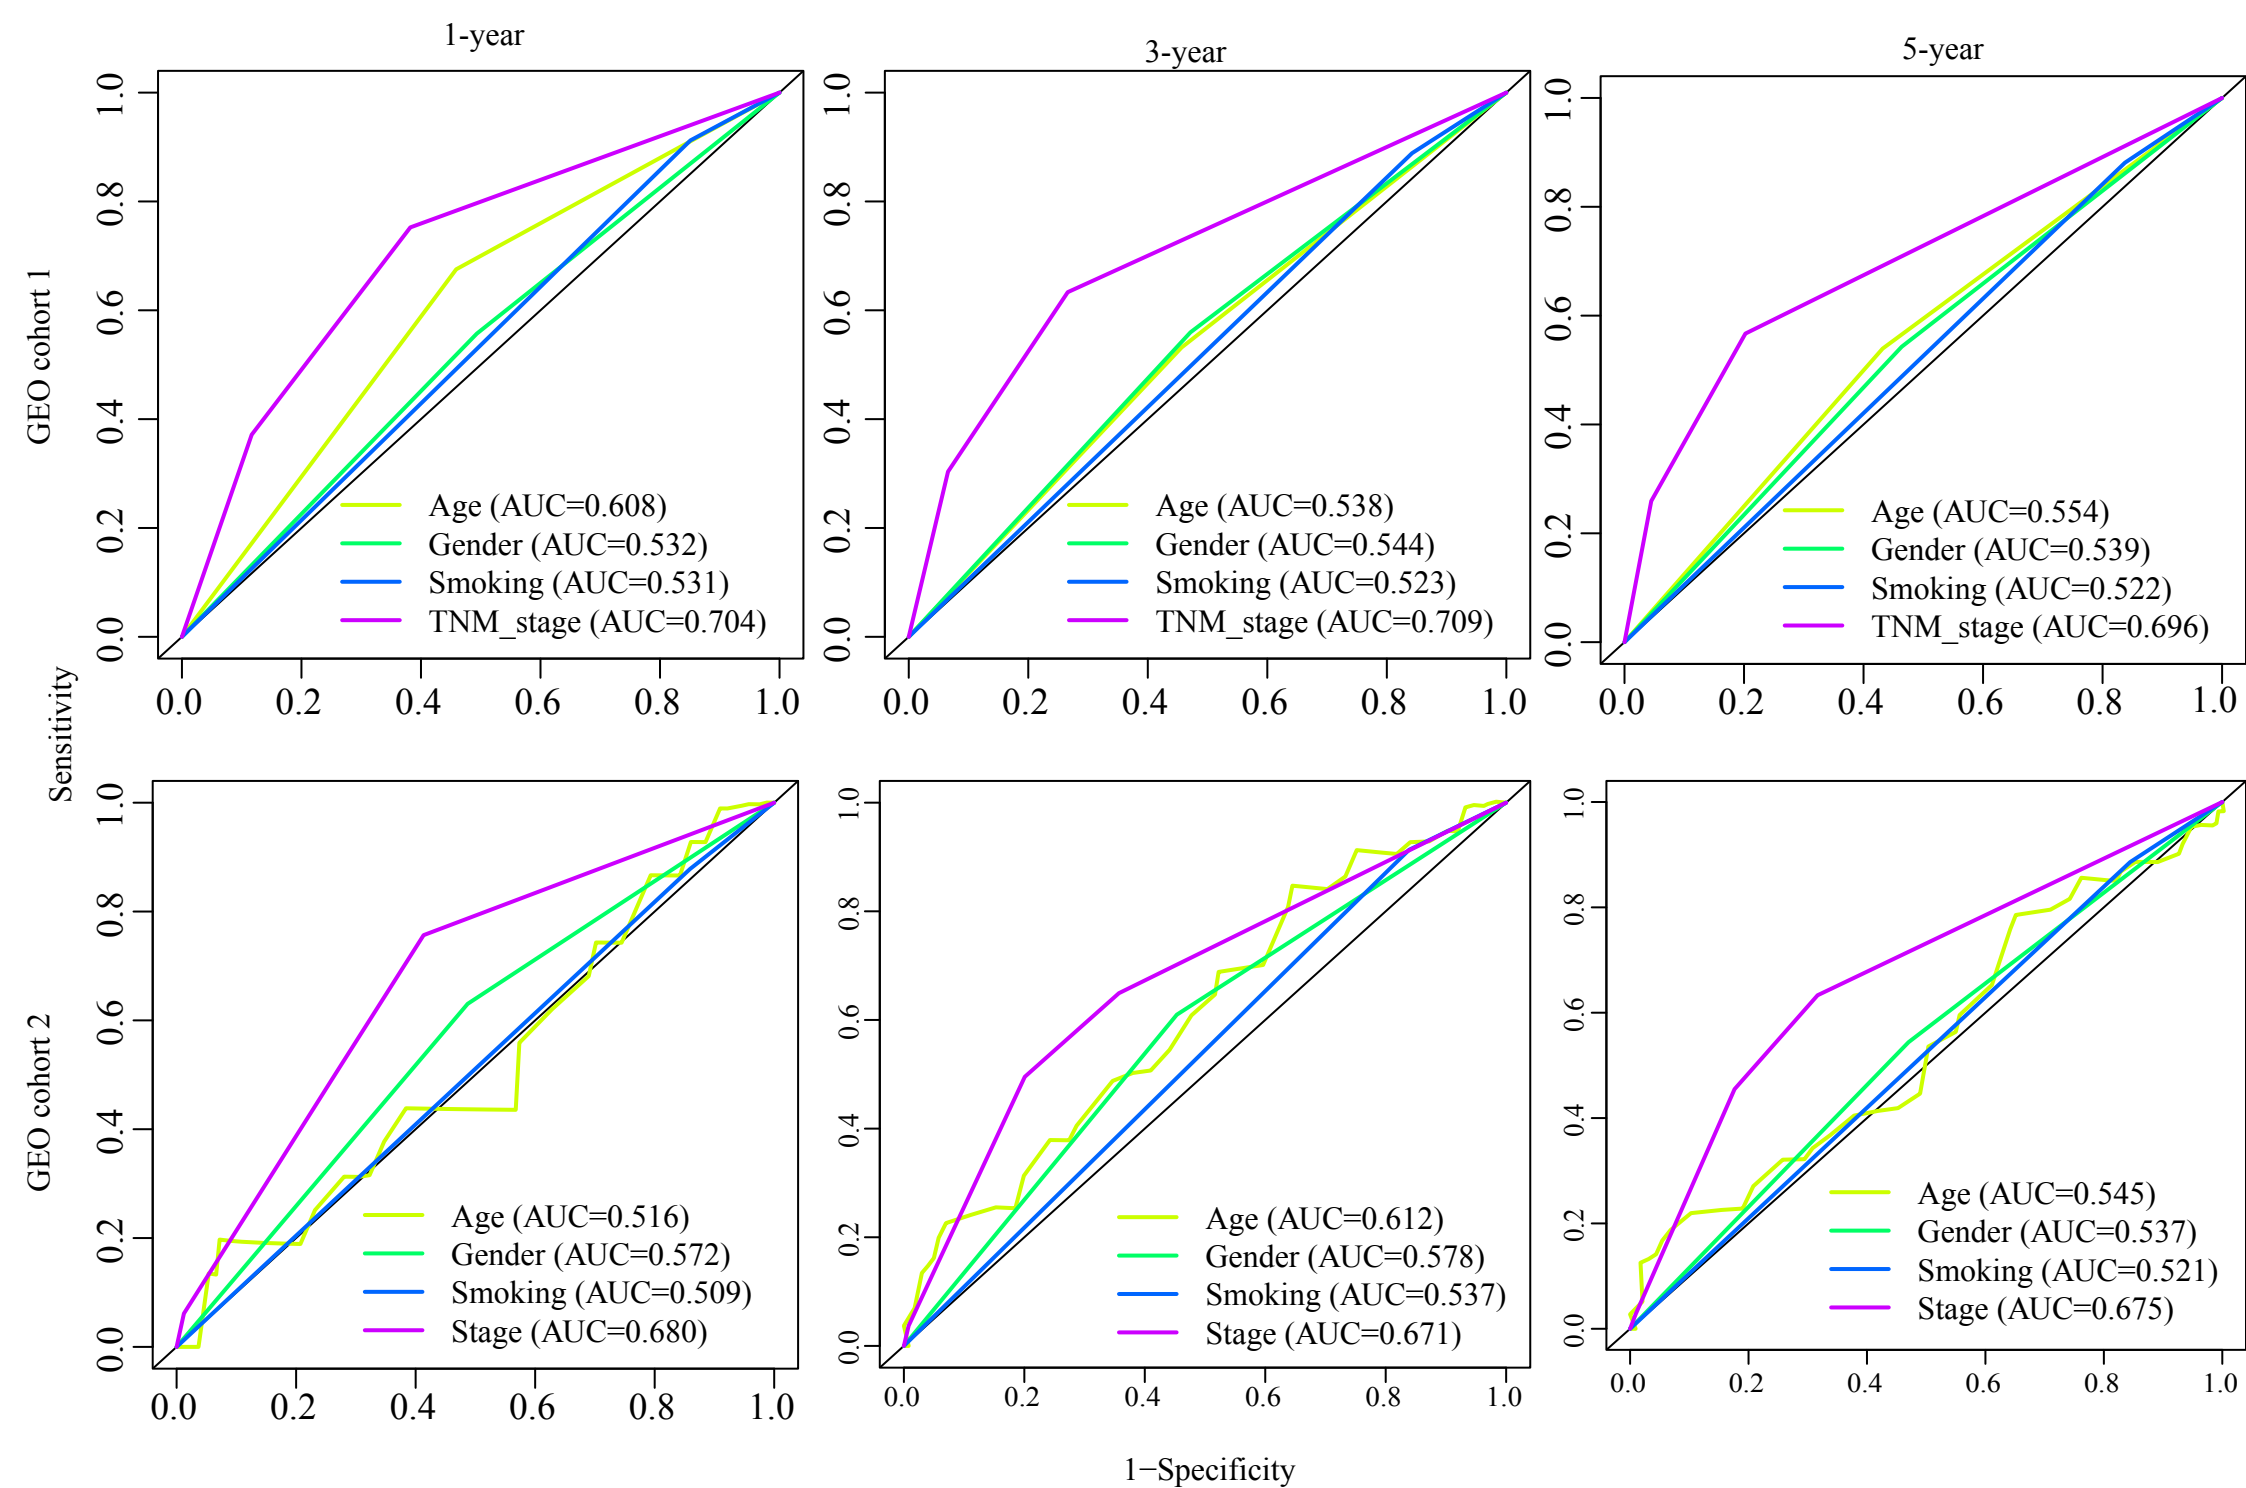

Supplement: peerj-09-11233-s002.pdf [file peerj-09-11233-s002.pdf]
